# Supplementary material
Source: publisher figshare collection journal article supplement (https://tandf.figshare.com/ndownloader/files/13692995)
Supplement: Supplementary file 1 [file 13692995]

**Table 1. Frequency of dicentrics and WBD estimated with biological and physical techniques at 4 different times during the treatment.**

| **Treatment phase** | Biodosimetry | | | | | Physical dosimetry |
| --- | --- | --- | --- | --- | --- | --- |
| Number of cells | Frequency dicentrics* | Cumulated WBD (Gy)** | WBD (Gy)** |  | WBD (Gy) ** |
| **day0 (before first 131I-mIBG)** | 100 | 0.030±0.017 | 0.47 (0.12-1.01) | 2.24 (1.44-2.85) |  | 1.45±0.42 |
| **day7** | 100 | 0.440±0.066 | 2.71 (2.25-3.21) |  |
| **day21 (before second 131I-mIBG)** | 100 | 0.350±0.059 | 2.38 (1.92-2.88) | 1.29 ( 0.63-1.93) |  | 0.87±0.23 |
| **day28** | 111 | 0.748±0.082 | 3.66 (3.22-4.12) |  |
| Total WBD | | | | 3.53 ( 2.58-4.41)*** |  | 2.32±0.48*** |
| * SE: Standar error  **95% confidence interval (CABAS software)  *** Sum of WBD after two administrations | | | | | | |
